# Supplementary material for: An adhesive, low swelling and conductive tri-network hydrogel for wearable electronic devices
Source: Royal Society of Chemistry journal article supplement (doi:10.1039/d4tc01263a), 2024-01-01
Supplement: d4tc01263a1.pdf [file d4tc01263a1.pdf]

## **An adhesive, low swelling and conductive tri-network hydrogel for wearable electronic devices**

**Mengyuan Hu<sup>†a,b</sup>, Longhai Qiu<sup>c,#</sup>, Yuliang Huang<sup>c</sup>, Donghui Wang<sup>a,\*</sup>,**

**Jiongliang Li<sup>d</sup>, Chunyong Liang<sup>b</sup>, Gen Wu<sup>e,\*</sup>, Feng Peng<sup>d,\*</sup>**

<sup>a</sup> Hebei Key Laboratory of Biomaterials and Smart Theranostics, School of Health Sciences and Biomedical Engineering, Hebei University of Technology, Tianjin 300130, China.

<sup>b</sup> School of Materials Science and Engineering, Hebei University of Technology, Tianjin 300130, China

<sup>c</sup> Department of Traumatology and Orthopaedic Surgery, Institute of Orthopaedics, Huizhou Central People's Hospital, Huizhou, 516001, China

<sup>d</sup> Medical Research Institute, Department of Orthopedics, Guangdong Provincial People's Hospital, Guangdong Academy of Medical Sciences, Southern Medical University, Guangzhou, Guangdong 510080, China

<sup>e</sup> Department of Orthopaedics, The Fifth Affiliated Hospital, Southern Medical University, Guangzhou, 510009, China

**\* Correspondence: pengfeng@gdph.org.cn.**

**A**

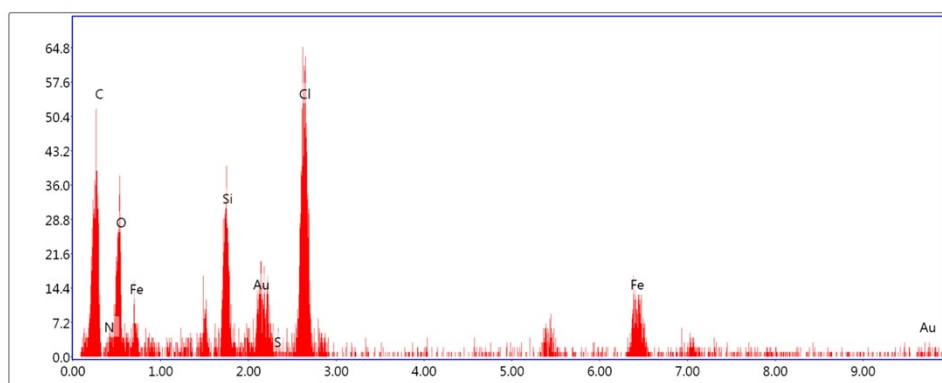

**B**

Lsec: 29.5 0 Cnts 0.000 keV Det: Octane Pro Det

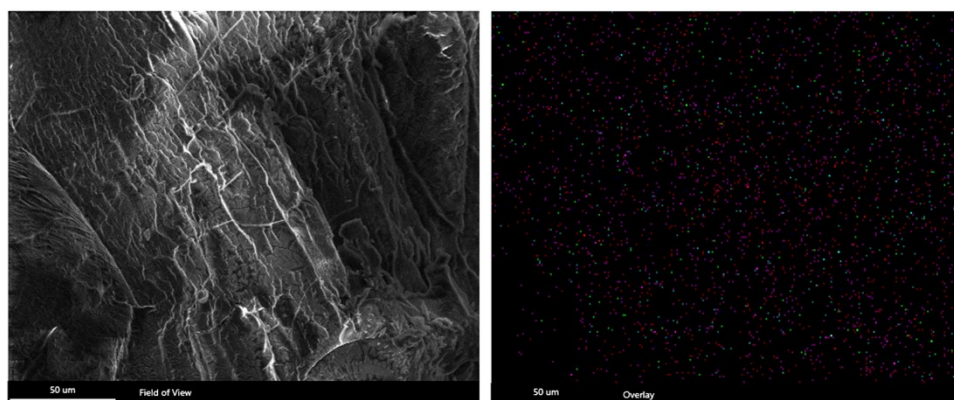

**C**

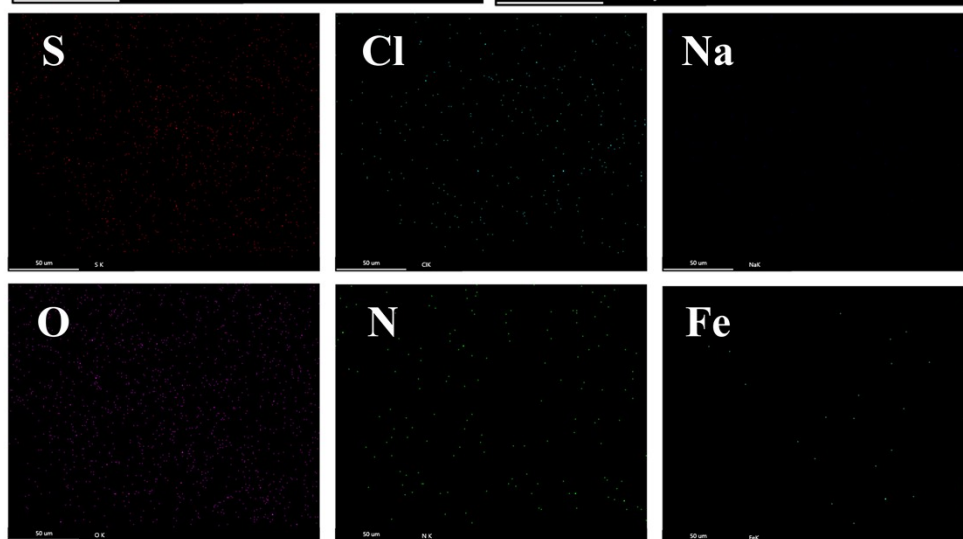

**Figure S1.** A) EDS elemental analysis of TN hydrogels. B-C) EDX Mapping Analysis of TN Hydrogels.
